# Supplementary material for: A comprehensive evaluation of the role of genetic variation in follicular lymphoma survival
Source: PubMed Central journal article supplement (PMC4411784; doi:10.1186/s12881-014-0113-6), 2014-10-08

## **SUPPORTING INFORMATION**

**Supplement to:**

**A comprehensive evaluation of the role of genetic variation in follicular lymphoma survival**

Fredrik Baecklund et. al. 2014

Correspondence should be addressed to:

Fredrik Baecklund, MD

Unit of Clinical Epidemiology

Dept of Medicine Solna, Karolinska Institutet

Karolinska University Hospital

SE-171 76 Solna, Sweden

E-mail: [fredrik.baecklund@ki.se](mailto:fredrik.baecklund@ki.se).

**Supplementary Table 1** Top SNPs associated with lymphoma-specific death ( $p_{\text{random}} < 5.0 \times 10^{-5}$ ) in the meta-analysis of FL patients in SCALE and UCSF (N=586). The six top SNPs on chromosome 17 and the two top SNPs on chromosome 1 are in LD (in SCALE  $r^2 \geq 0.96$  and  $r^2 = 0.7$ , respectively). The minor allele (A1) was investigated for association. A2=major allele, MAF= minor allele frequency, NA= not applicable

| CHR | SNP        | Position  | A1 | A2 | MAF  | SCALE             |                    | UCSF              |                   | Meta-analysis     |                     |                  | Heterogeneity |         |              | Gene         | Left gene | Right gene |
|-----|------------|-----------|----|----|------|-------------------|--------------------|-------------------|-------------------|-------------------|---------------------|------------------|---------------|---------|--------------|--------------|-----------|------------|
|     |            |           |    |    |      | HR (95% CI)       | $p_{\text{SCALE}}$ | HR (95% CI)       | $p_{\text{UCSF}}$ | HR (95% CI)       | $p_{\text{RANDOM}}$ | $p_{\text{HET}}$ | $I^2$         |         |              |              |           |            |
| 17  | rs10491178 | 64661568  | A  | G  | 0.06 | 3.10 (1.97; 4.89) | 1.13E-06           | 3.50 (1.28; 9.53) | 1.36E-02          | 3.17 (2.09; 4.79) | 5.24E-08            | 0.83             | 0             | ABCA10  | ABCA6        | LOC100133319 |           |            |
| 17  | rs6502005  | 64615106  | C  | A  | 0.06 | 3.06 (1.94; 4.84) | 1.49E-06           | 3.79 (1.33; 10.9) | 1.20E-02          | 3.17 (2.09; 4.82) | 6.48E-08            | 0.71             | 0             | ABCA6   | ABCA9        | ABCA10       |           |            |
| 17  | rs8067965  | 64629023  | G  | A  | 0.06 | 3.06 (1.94; 4.84) | 1.49E-06           | 3.55 (1.25; 10.0) | 1.61E-02          | 3.14 (2.07; 4.76) | 8.12E-08            | 0.80             | 0             | ABCA6   | ABCA9        | ABCA10       |           |            |
| 17  | rs7212506  | 64613313  | G  | A  | 0.06 | 3.06 (1.94; 4.84) | 1.49E-06           | 3.54 (1.25; 10.0) | 1.62E-02          | 3.14 (2.07; 4.76) | 8.15E-08            | 0.80             | 0             | ABCA6   | ABCA9        | ABCA10       |           |            |
| 1   | rs3131729  | 57971355  | A  | G  | 0.13 | 2.58 (1.77; 3.76) | 9.24E-07           | 2.00 (0.92; 4.31) | 7.58E-02          | 2.45 (1.75; 3.44) | 2.22E-07            | 0.56             | 0             | DAB1    | C8B          | LOC729423    |           |            |
| 17  | rs1468514  | 64608807  | A  | G  | 0.06 | 3.09 (1.91; 5.00) | 4.16E-06           | 3.55 (1.25; 10.0) | 1.61E-02          | 3.17 (2.05; 4.90) | 2.24E-07            | 0.82             | 0             | ABCA6   | ABCA9        | ABCA10       |           |            |
| 17  | rs2886048  | 64600537  | A  | G  | 0.06 | 3.09 (1.91; 5.00) | 4.16E-06           | 3.55 (1.25; 10.0) | 1.61E-02          | 3.17 (2.05; 4.90) | 2.24E-07            | 0.82             | 0             | ABCA6   | ABCA9        | ABCA10       |           |            |
| 4   | rs11932201 | 14304530  | C  | A  | 0.17 | 2.10 (1.48; 2.97) | 2.93E-05           | 2.50 (1.13; 5.55) | 2.29E-02          | 2.16 (1.57; 2.97) | 2.24E-06            | 0.69             | 0             | NA      | LOC152742    | LOC441009    |           |            |
| 1   | rs1323822  | 57999180  | A  | G  | 0.11 | 2.38 (1.60; 3.56) | 2.21E-05           | 1.84 (0.84; 4.04) | 1.24E-01          | 2.26 (1.58; 3.23) | 7.76E-06            | 0.57             | 0             | DAB1    | C8B          | LOC729423    |           |            |
| 19  | rs2250066  | 56220931  | A  | G  | 0.15 | 2.07 (1.45; 2.97) | 7.31E-05           | 2.35 (1.01; 5.44) | 4.40E-02          | 2.11 (1.52; 2.94) | 9.38E-06            | 0.79             | 0             | KLK11   | KLK10        | KLK12        |           |            |
| 20  | rs846222   | 58658321  | A  | G  | 0.20 | 2.08 (1.44; 2.99) | 8.21E-05           | 1.94 (0.91; 4.12) | 8.14E-02          | 2.05 (1.48; 2.85) | 1.74E-05            | 0.87             | 0             | NA      | MTCO2L       | CDH4         |           |            |
| 18  | rs2061158  | 63168592  | A  | G  | 0.19 | 2.00 (1.43; 2.82) | 6.27E-05           | 1.69 (0.84; 3.40) | 1.38E-01          | 1.94 (1.43; 2.63) | 2.22E-05            | 0.67             | 0             | NA      | CDH19        | DSEL         |           |            |
| 17  | rs8074294  | 61902137  | G  | A  | 0.39 | 1.82 (1.33; 2.48) | 1.54E-04           | 1.85 (0.95; 3.59) | 6.61E-02          | 1.83 (1.38; 2.42) | 2.67E-05            | 0.97             | 0             | PRKCA   | APOH         | CACNG5       |           |            |
| 6   | rs10484325 | 7502047   | G  | A  | 0.17 | 2.14 (1.50; 3.05) | 2.80E-05           | 1.45 (0.59; 3.55) | 4.15E-01          | 2.03 (1.46; 2.82) | 2.77E-05            | 0.43             | 0             | DSP     | LOC100131914 | C6orf151     |           |            |
| 9   | rs11788432 | 94828444  | G  | A  | 0.29 | 1.82 (1.30; 2.56) | 5.50E-04           | 2.82 (1.27; 6.26) | 1.00E-02          | 1.95 (1.42; 2.66) | 2.93E-05            | 0.32             | 0             | FGD3    | LOC642959    | SUSD3        |           |            |
| 7   | rs2060723  | 131551689 | A  | G  | 0.38 | 1.81 (1.33; 2.46) | 1.55E-04           | 1.71 (0.93; 3.16) | 8.13E-02          | 1.79 (1.36; 2.35) | 3.25E-05            | 0.88             | 0             | PLXNA4  | LOC100129705 | FLJ40288     |           |            |
| 7   | rs12668564 | 95278209  | G  | A  | 0.21 | 1.82 (1.30; 2.56) | 5.36E-04           | 2.22 (1.14; 4.32) | 1.77E-02          | 1.90 (1.40; 2.57) | 3.31E-05            | 0.61             | 0             | DYNC111 | PKD4         | SLC25A13     |           |            |
| 4   | rs1868416  | 59316610  | G  | A  | 0.41 | 1.82 (1.34; 2.49) | 1.53E-04           | 1.66 (0.92; 2.99) | 8.72E-02          | 1.79 (1.36; 2.35) | 3.49E-05            | 0.78             | 0             | NA      | SRIL         | LPHN3        |           |            |
| 13  | rs9551348  | 26475083  | G  | A  | 0.20 | 1.82 (1.28; 2.57) | 7.72E-04           | 2.25 (1.15; 4.43) | 1.75E-02          | 1.90 (1.39; 2.59) | 4.78E-05            | 0.58             | 0             | NA      | GPR12        | LOC100129306 |           |            |

**Supplementary Table 2.** Relative risk<sup>A</sup> of lymphoma-specific and all-cause death in SCALE (N=373), and lymphoma progression in SCALE Sweden (N=231) for the top SNPs in the pooled analysis of SCALE and UCSF. The minor allele was investigated for association. The minor allele (A1) was investigated for association. A2=major allele, MAF= minor allele frequency, NA= not applicable

|     |            |          |    |    |      | SCALE                   |          |                   |          | SCALE Sweden         |         |        |
|-----|------------|----------|----|----|------|-------------------------|----------|-------------------|----------|----------------------|---------|--------|
|     |            |          |    |    |      | Lymphoma-specific death |          | All-cause death   |          | Lymphoma progression |         |        |
| CHR | SNP        | Position | A1 | A2 | MAF  | HR (95% CI)             | p        | HR (95% CI)       | p        | HR (95% CI)          | p       | Gene   |
| 17  | rs10491178 | 64661568 | A  | G  | 0.06 | 3.10 (1.97; 4.89)       | 1.13E-06 | 2.00 (1.35; 2.97) | 5.68E-04 | 1.02 (0.63; 1.65)    | 9.40E-1 | ABCA10 |
| 1   | rs3131729  | 57971355 | A  | G  | 0.13 | 2.58 (1.77; 3.76)       | 9.24E-07 | 1.86 (1.37; 2.53) | 6.46E-05 | 1.68 (1.20; 2.35)    | 2.00E-3 | DAB1   |
| 4   | rs11932201 | 14304530 | C  | A  | 0.17 | 2.10 (1.48; 2.97)       | 2.93E-05 | 1.56 (1.17; 2.08) | 2.30E-03 | 1.31 (0.97; 1.75)    | 7.00E-2 | NA     |
| 19  | rs2250066  | 56220931 | A  | G  | 0.15 | 2.07 (1.45; 2.97)       | 7.31E-05 | 1.50 (1.10; 2.04) | 1.05E-02 | 1.13 (0.82; 1.56)    | 4.70E-1 | KLK11  |

<sup>A</sup> Estimated with Hazard ratio, HR, and 95% confidence interval, CI. Adjusted for age at diagnosis, sex and three principal components.

**Supplementary Table 3.** Relative risk<sup>A</sup> of lymphoma-specific death and lymphoma progression for SNPs previously associated with follicular lymphoma risk<sup>B</sup>. The minor allele (A1) was investigated for association. A2=major allele, MAF= minor allele frequency

| CHR | Gene                               | SNP        | Position  | A1 | A2 | MAF  | Lymphoma-specific death  |      | Progression <sup>C</sup> |      |
|-----|------------------------------------|------------|-----------|----|----|------|--------------------------|------|--------------------------|------|
|     |                                    |            |           |    |    |      | HR (95% CI) <sup>A</sup> | p    | HR (95% CI) <sup>A</sup> | p    |
| 2   | <i>BCL2L11</i>                     | rs3789068  | 111625718 | A  | G  | 0.45 | 1.22 (0.91; 1.63)        | 0.19 | 0.96 (0.78; 1.19)        | 0.74 |
| 6   | HLA II- region                     | rs2647012  | 32772436  | A  | G  | 0.32 | 0.70 (0.47; 1.02)        | 0.06 | 0.92 (0.69; 1.22)        | 0.56 |
| 6   | HLA II- region                     | rs10484561 | 32773398  | C  | A  | 0.18 | 0.91 (0.62; 1.33)        | 0.62 | 0.77 (0.58; 1.02)        | 0.07 |
| 10  | <i>FAS</i>                         | rs4934436  | 90773300  | G  | A  | 0.48 | 0.84 (0.62; 1.14)        | 0.27 | 0.98 (0.78; 1.25)        | 0.89 |
| 13  | <i>TNFSF13B</i><br>( <i>BAFF</i> ) | rs2582869  | 107710146 | A  | G  | 0.40 | 1.32 (0.97; 1.79)        | 0.07 | 1.08 (0.86; 1.36)        | 0.51 |

<sup>A</sup> Estimated with Hazard ratio, HR, and 95% confidence interval, CI. Adjusted for age at diagnosis, sex and three principal components.

<sup>B</sup> rs6457327 has previously been associated with both FL risk and prognosis. The results are shown in Table 4.

<sup>C</sup> Swedish cases only (N=231) for time to progression

**Supplementary Figure 1.** Manhattan plot of the  $-\log_{10}(p\text{-values})$  for the association with lymphoma-specific death in SCALE (A) and UCSF (B), by chromosome and within chromosome location. The top ten SNPs in the meta-analysis are highlighted (light green). The red line indicates the cut off level for genome-wide significance  $-\log_{10}(5.0 \times 10^{-8})$

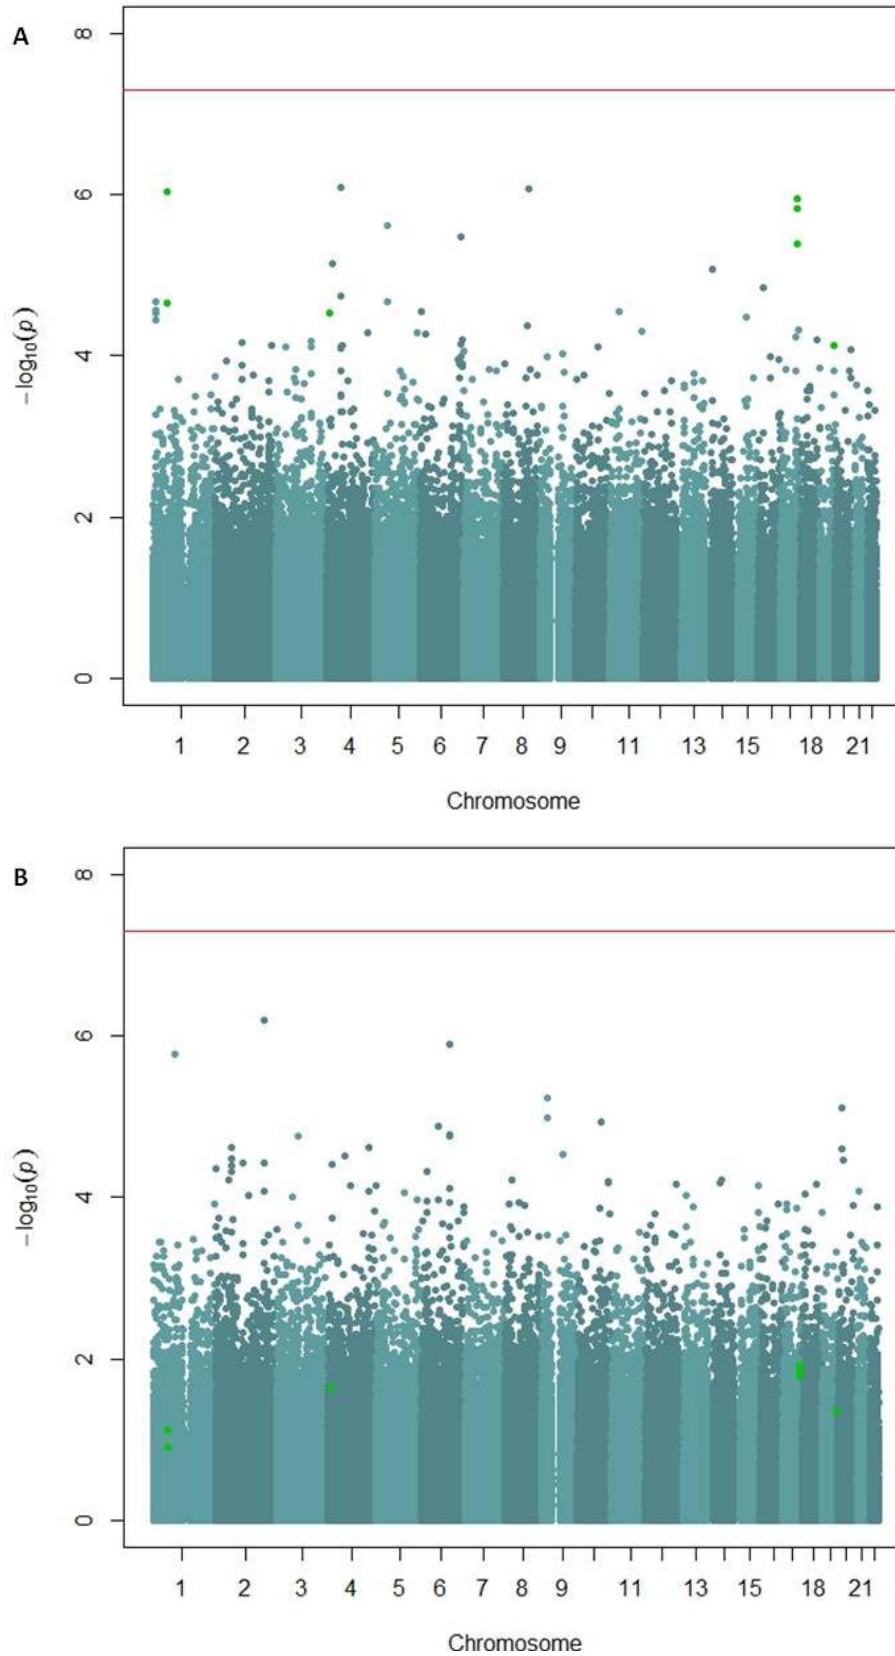

**Supplementary Figure 2.** QQ plot of the observed versus the expected  $-\log(p\text{-values})$  for the association with lymphoma-specific death in SCALE (A) and UCSF (B)

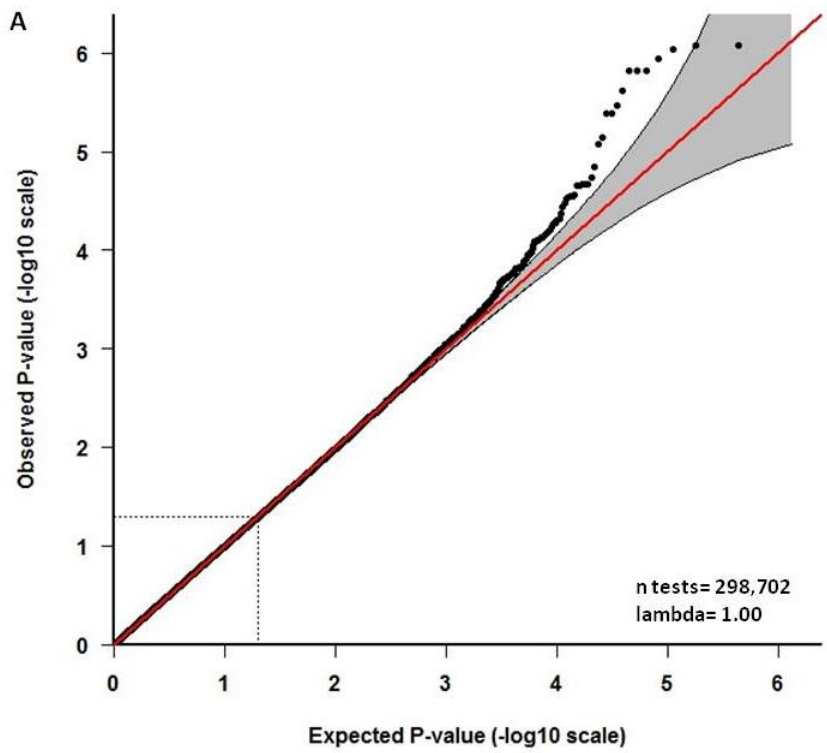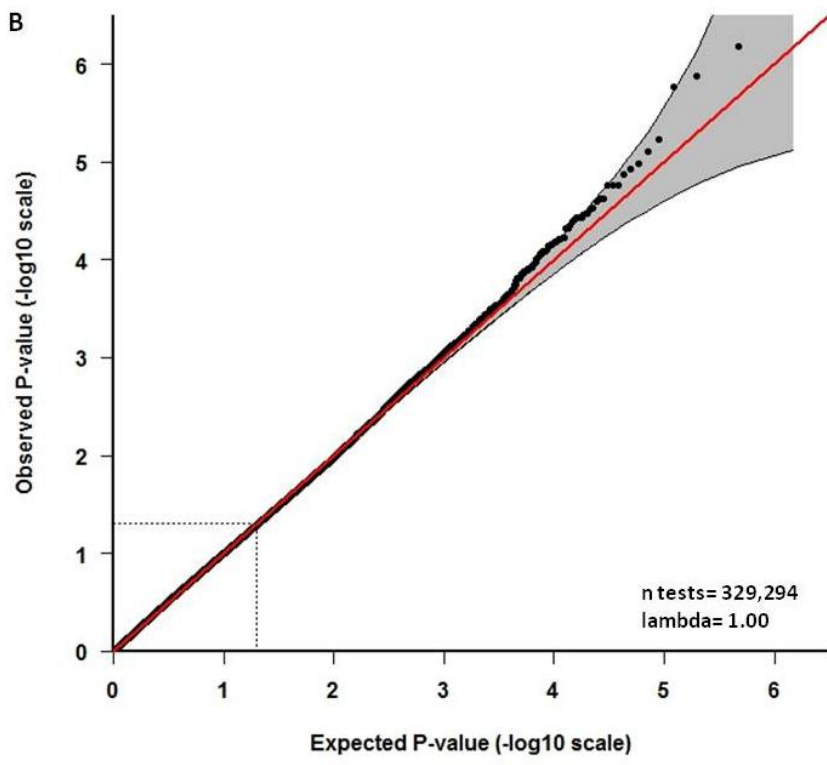

**Supplementary Figure 3.** Manhattan plot of the  $-\log_{10}(p\text{-values})$  for the association with lymphoma-specific death in the meta-analysis of SCALE and UCSF. The top ten SNPs ( $p_{\text{random}} \leq 10^{-6}$ ) are highlighted (light green). The red line indicates the cut off level for genome-wide significance  $-\log_{10}(5.0 \times 10^{-8})$

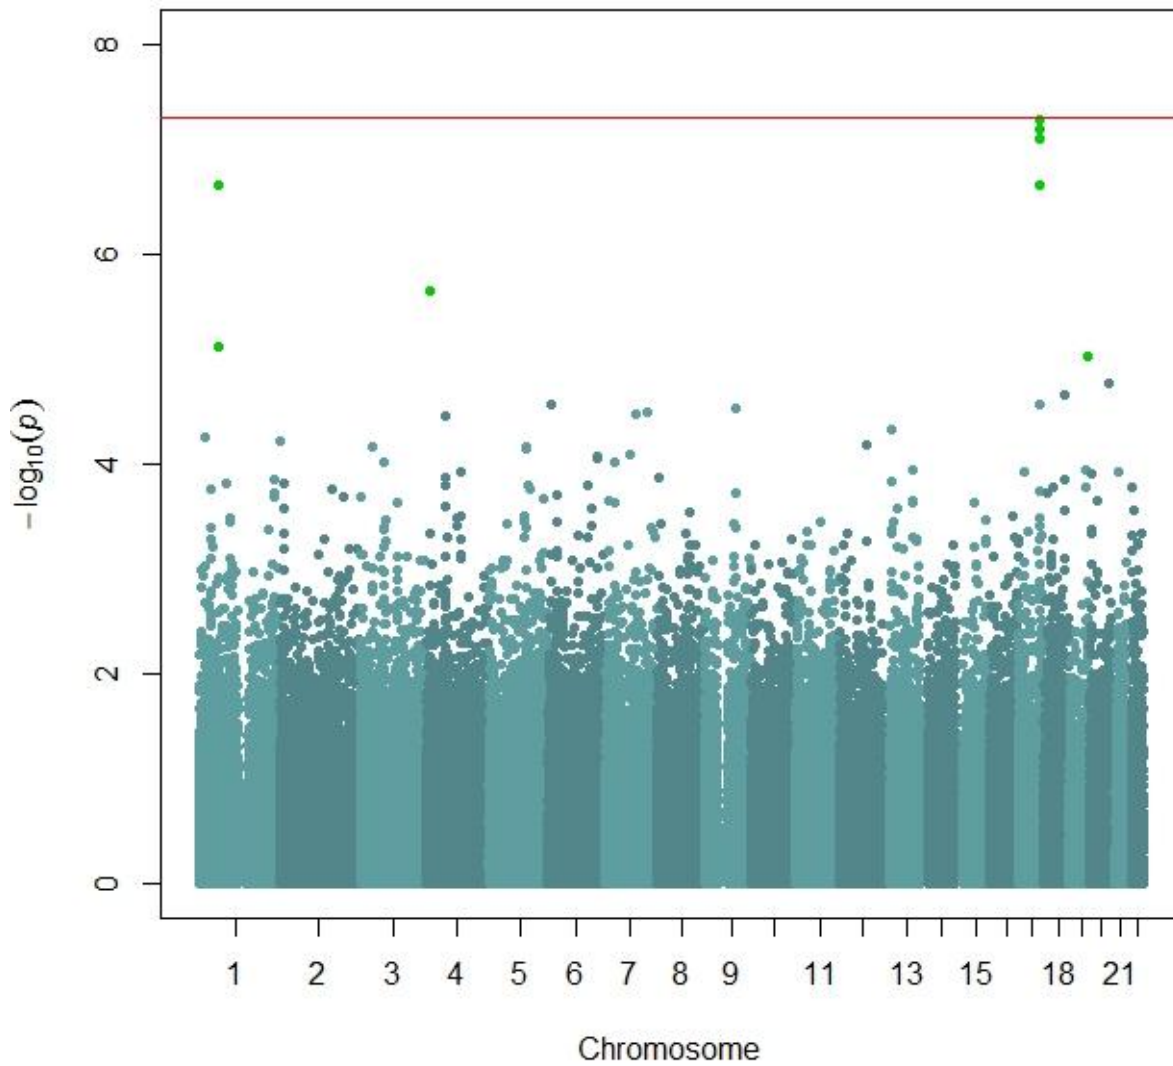

**Supplementary Figure 4.** QQ plot of the observed versus the expected  $-\log(p\text{-values})$  for the association with lymphoma-specific death in the meta-analysis of SCALE and UCSF

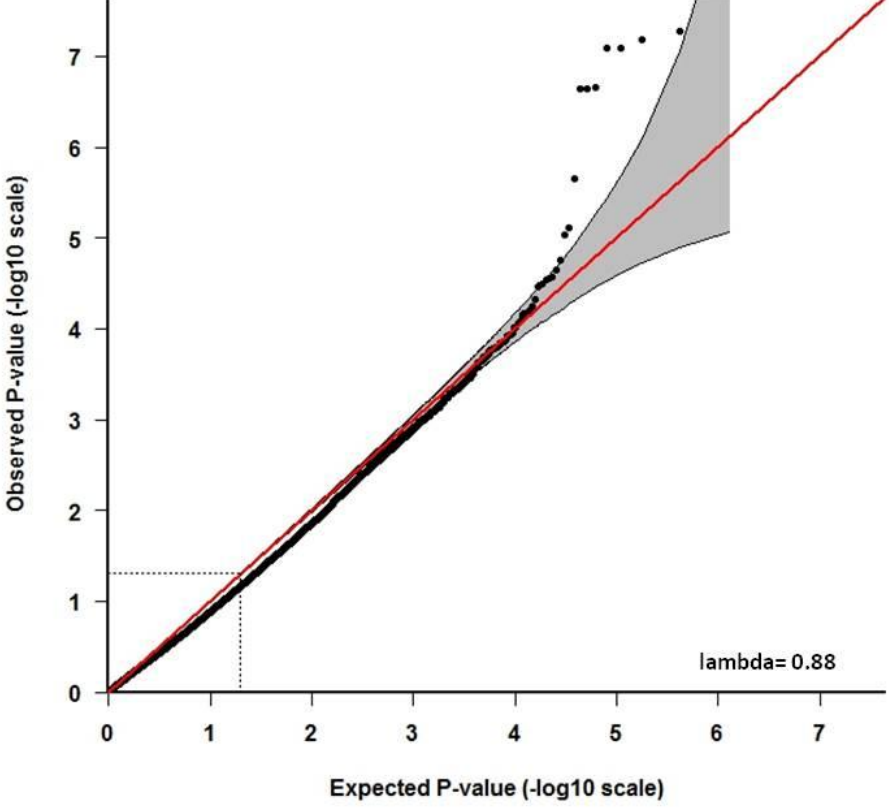



**Supplementary Figure 5.** Regional association plot of the top locus in the combined analysis on 17q, displaying the p-values of association in SCALE, extent of LD with rs10491178 as reference (using data from 1000 Genomes EUR), relation of SNPs and genes, and estimated recombination rates at each position

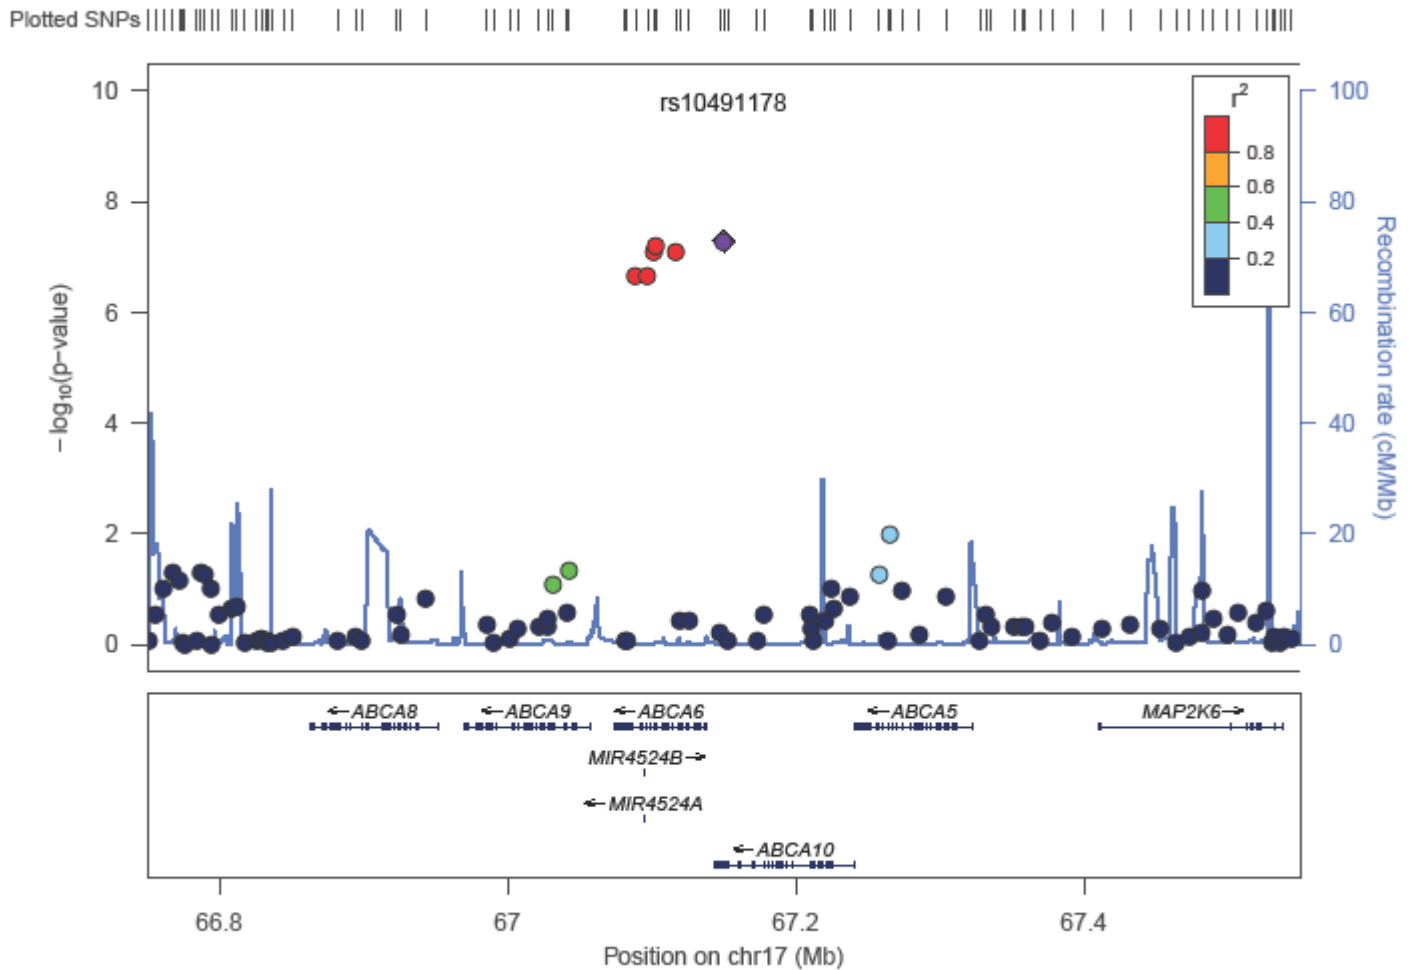

**Supplementary Figure 6.** Estimations of the power to detect associations between selected candidate SNPs and lymphoma-specific death and lymphoma progression, respectively, for different effect sizes and minor allele frequencies (MAF)

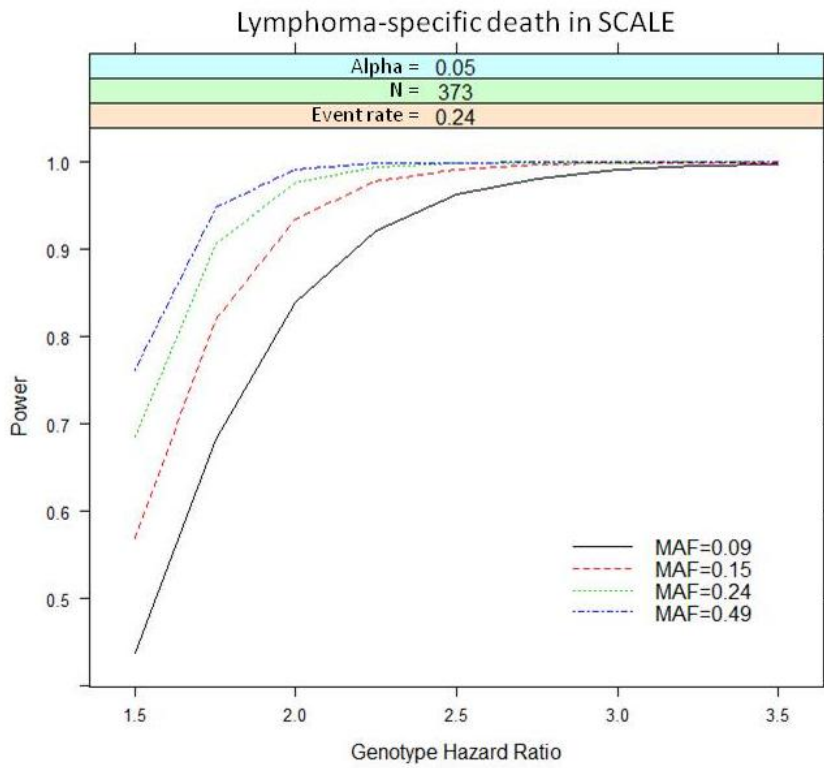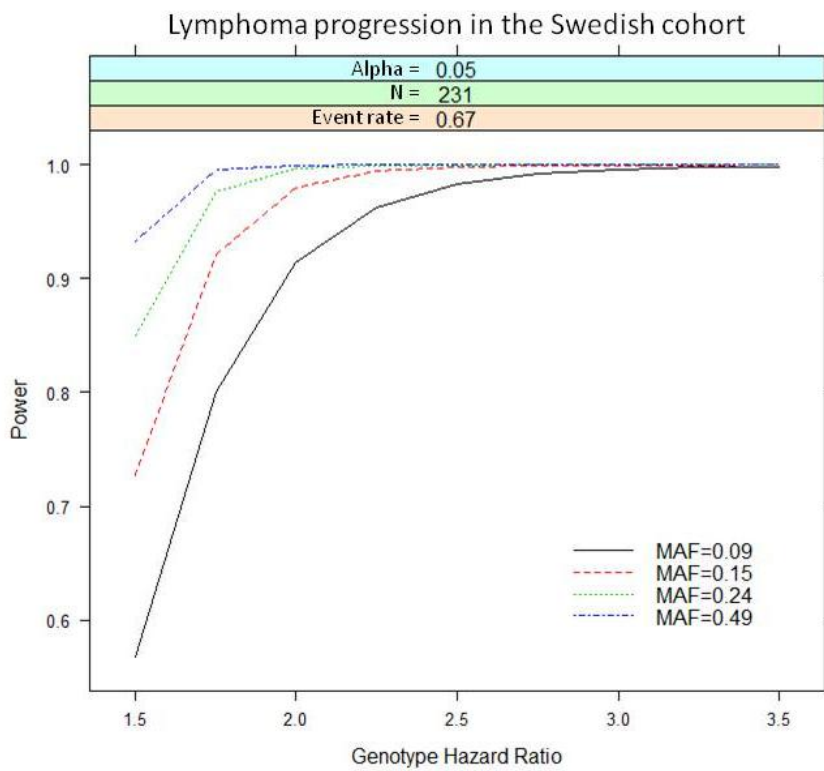

Supplement: 12881_2014_113_MOESM1_ESM.pdf [file 12881_2014_113_MOESM1_ESM.pdf]
